# Supplementary material
Source: Springer Nature journal article supplement (https://www.springermedizin.de/resource/supplementary/12872_2013_588_MOESM1_ESM.pdf/9430298)

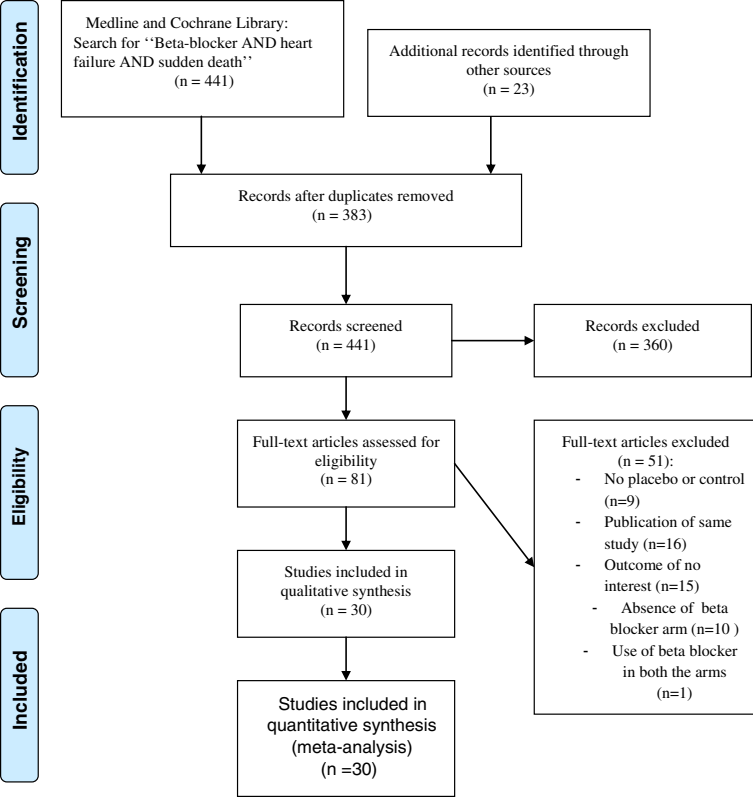

Supplement: MOESM1 [file 9430298]
